# Supplementary material
Source: MDPI journal article supplement (https://www.mdpi.com/2075-4442/11/10/438)
Supplement: s1 [file s1]

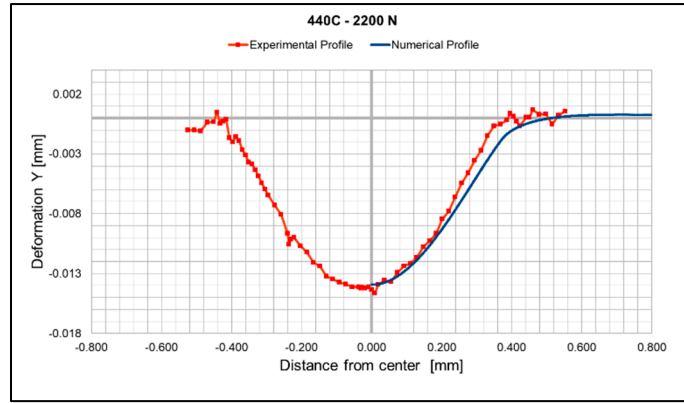

Figure S1: Numerical and experimental residual indentation profiles for the 440C material under an indentation load of 2200 N.

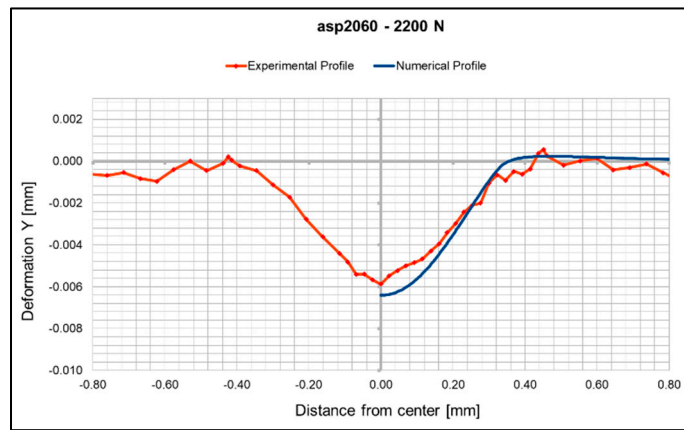

Figure S2: Numerical and experimental residual indentation profiles for the ASP 2060 PM material under an indentation load of 2200 N.

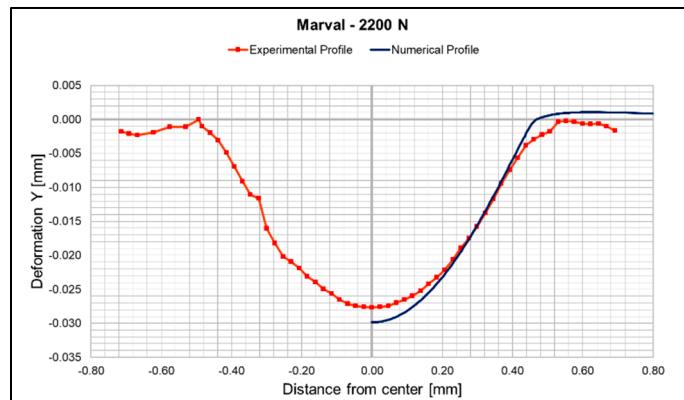

Figure S3: Numerical and experimental residual indentation profiles for the Marval X12 material under an indentation load of 2200 N.
